# Supplementary material for: DNA ligase III acts as a DNA strand break sensor in the cellular orchestration of DNA strand break repair
Source: PubMed Central journal article supplement — Nucleic Acids Res. 2014 Dec 24;43(2):875–92. doi: 10.1093/nar/gku1307 (PMC4333375; doi:10.1093/nar/gku1307), 2014-12-24

# Supplementary Figures

## Figure Legends

**Supplementary Figure S1.** Left panel shows western blots performed on HeLa cells 48 h after transient expression of PNKP-mGFP/mRFP (top), XRCC1-mGFP/mRFP (middle), and EGFP-FL LIG3/EGFP- $\Delta$ ZnF LIG3 (bottom). Right panel shows a schematic outline for all fluorescent proteins used in this study

**Supplementary Figure S2.** Cells co-expressing mGFP L360D (see Figure 2C) and WT XRCC1 mRFP were tested in different laser micro-irradiation systems (405-nm laser diode and multi-photon 750-nm). WT XRCC1 mRFP shows robust recruitment in response to both systems.

**Supplementary Figure S3.** Western blot showing PARP1 levels in PARP1 WT (F20) and null (A1) MEFs, where A549 lysate was used as a positive control.

**Supplementary Figure S4.** (A) Immunofluorescence staining, showing reduced formation of PAR following laser micro-irradiation in cells pretreated with AG14361.  $\gamma$ H2AX was used as a marker for DNA damage at laser tracks. (B) To ensure that the  $\gamma$ H2AX seen in the laser micro-irradiated tracks did not arise from stalled replication (i.e. conversion of SSB into DSB), non-synchronized HeLa cells transiently expressing mRFP-PCNA (marker for S-phase) were subjected to multi-photon 750-nm laser micro-irradiation as described in Materials and Methods (approximately 40 cells were analyzed). Subsequently (5-10 minutes post laser micro-irradiation) cells were fixed and stained for  $\gamma$ H2AX. A robust signal for  $\gamma$ H2AX was observed in all cells analyzed. A higher magnification of individual cells reveals PCNA distribution in S-phase (upper panel showing punctate PCNA distribution) and in non S-phase cells (lower panel showing a more homogeneous distribution of PCNA outside of the nucleoli).  $\gamma$ H2AX is detected in laser micro-IR tracks in S-phase and non S-phase cells. (C) Confirmation of the PARP inhibition results shown in Figure 5, using different PARP inhibitor, PJ-34. For recruitment curve, error bars represent S.E.M;  $n=24$ .

**Supplementary Figure S5.** Western blot showing the knock down of LIG3 by the Hush plasmid at different time points post transfection. Actin levels represent loading controls.

**Supplementary Figure S6.** Endogenous LIG3 shows robust accumulation at sites of DNA damage created by either (A) laser micro-irradiation or (B) by 10 mM H<sub>2</sub>O<sub>2</sub> even upon pre-treatment of cells with 1 and 2  $\mu$ M AG14361. (C and D) LIG3 did not co-localize with  $\gamma$ H2AX (universal DSB marker) or 53BP1 (NHEJ DSB marker). For AG14361 treatments, cells were incubated with either 1 or 2  $\mu$ M drug at 37°C for 1-2 hours, then cells were either subjected to laser micro-irradiation (see Materials and Methods), or treated with 10 mM H<sub>2</sub>O<sub>2</sub> for 10 minutes, then fixed and stained for immunofluorescence. We need to say something about the zoomed images in B and C

**Supplementary Figure S7.** FRAP analysis showing differences in binding kinetics in response to H<sub>2</sub>O<sub>2</sub> damage between FL-LIG3 and  $\Delta$ ZnF-LIG3. Error bars represent S.E.M;  $n=24$ .

**Supplementary Figure S8.** FRAP analysis showing the differences in binding kinetics of PARP1 in the presence and absence of DNA damage introduced by H<sub>2</sub>O<sub>2</sub>. Error bars represent S.E.M;  $n=24$ .

Figure S1

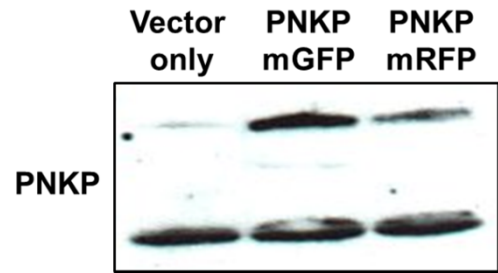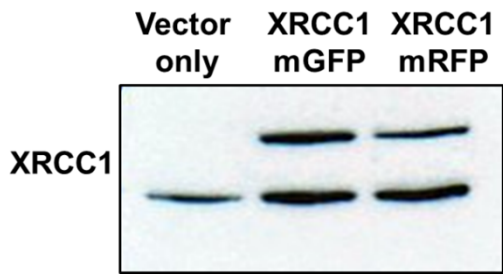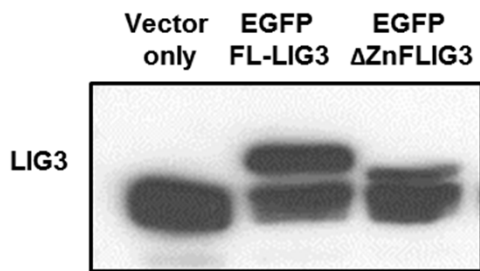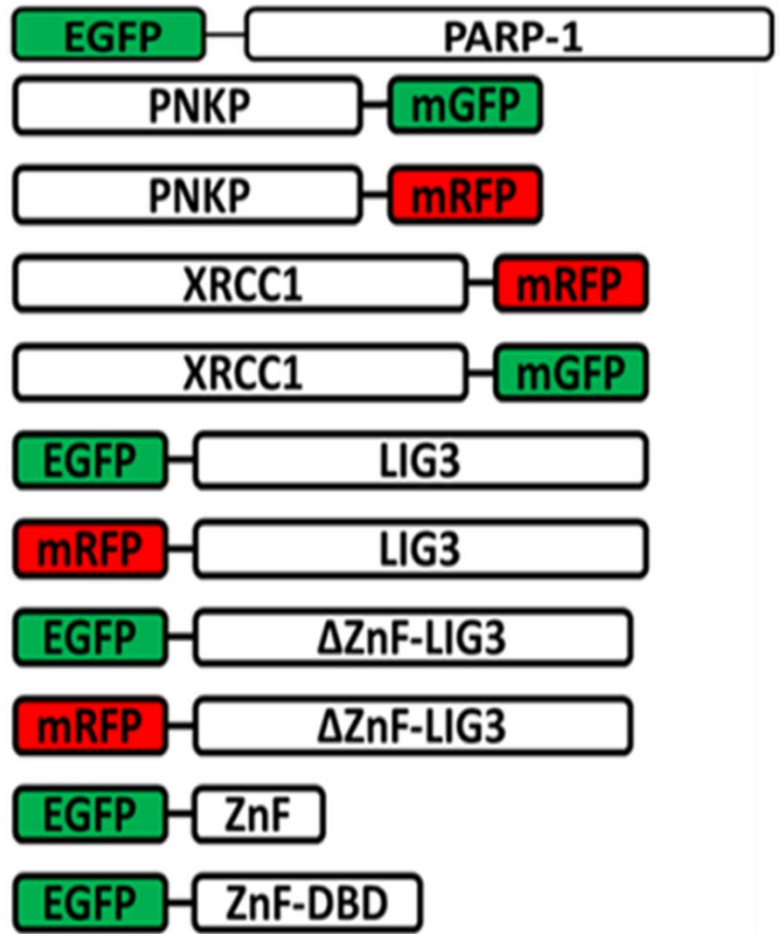

Figure S2

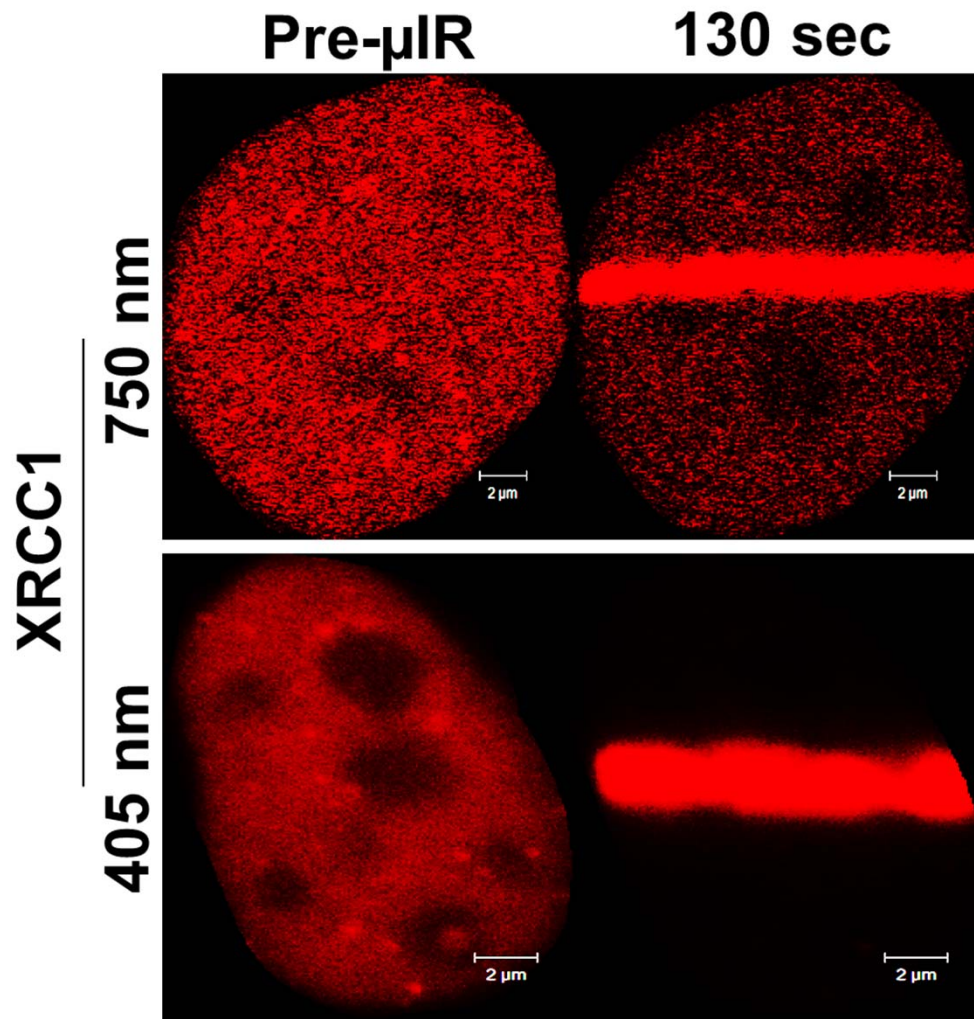

Figure S3

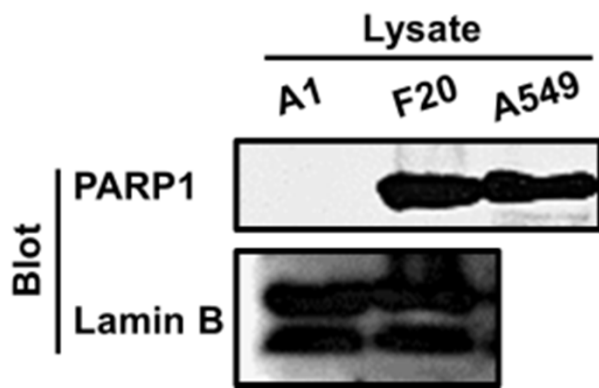

Figure S4

A)

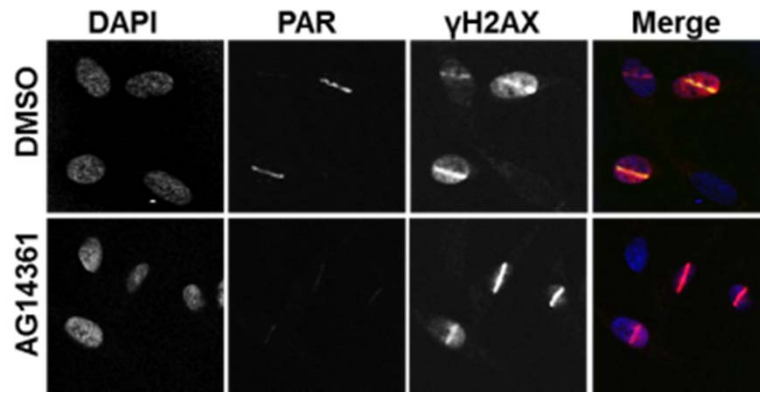

B)

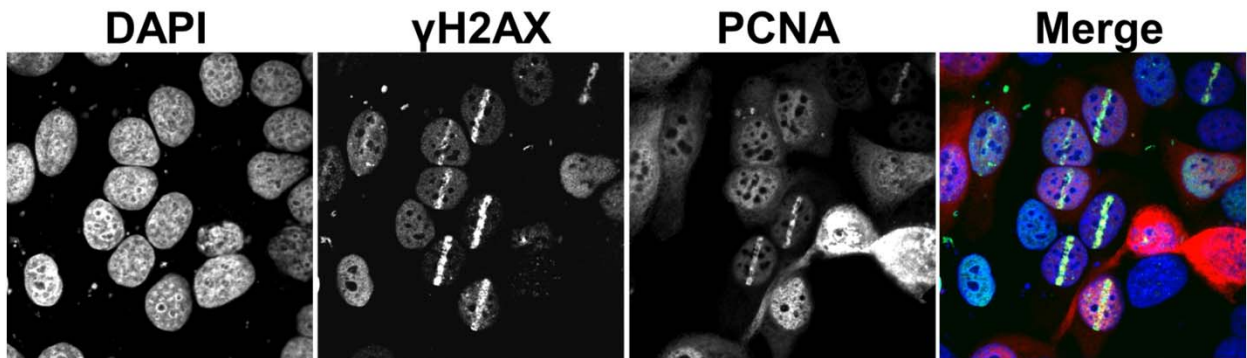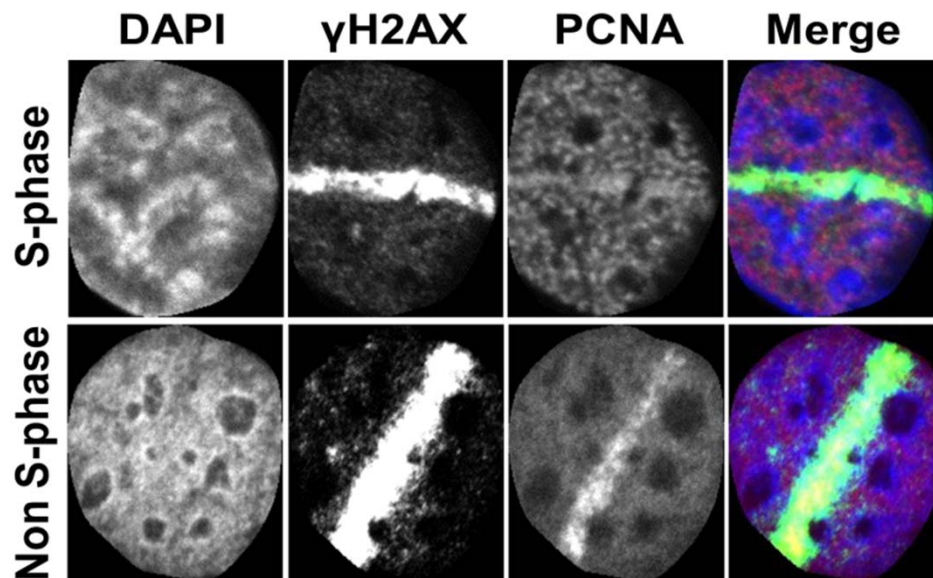

C)

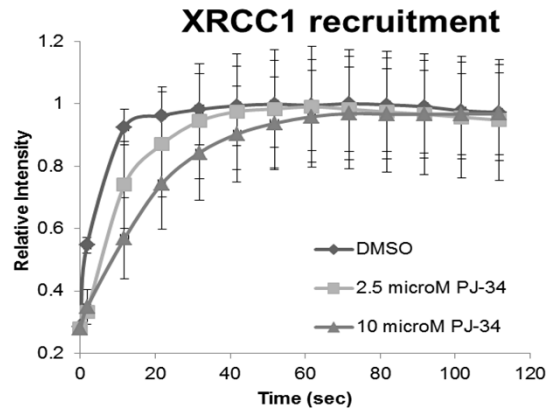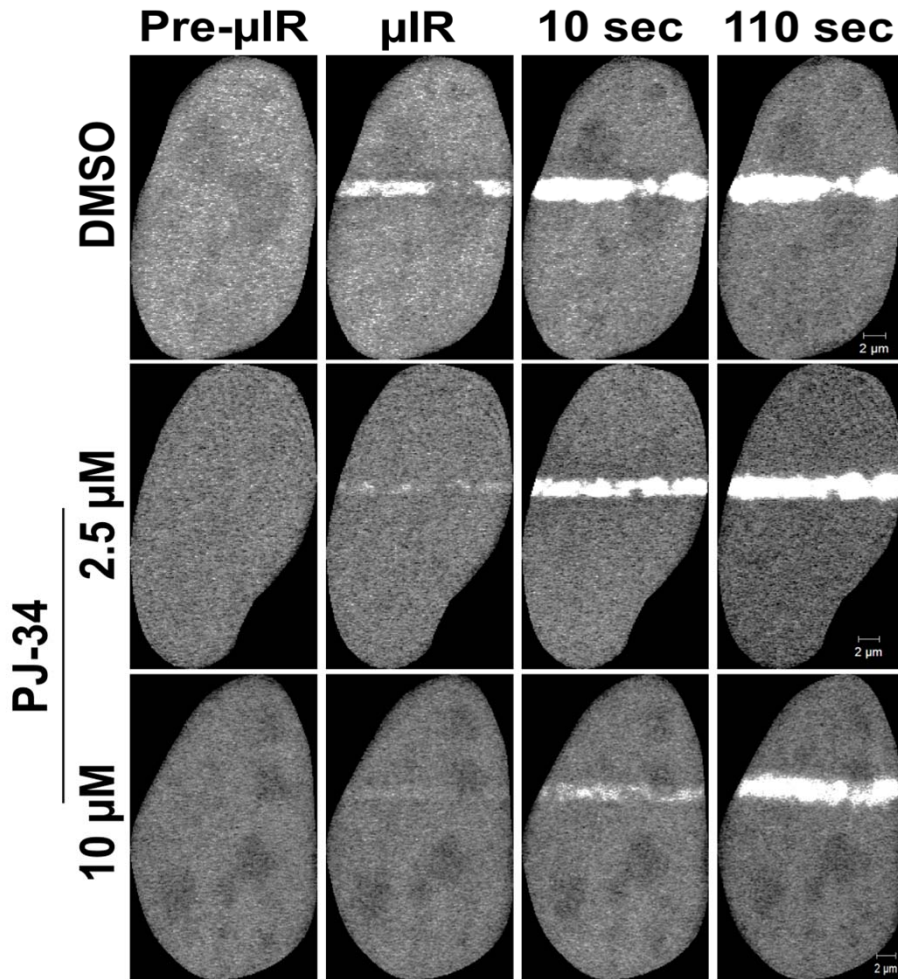

Figure S5

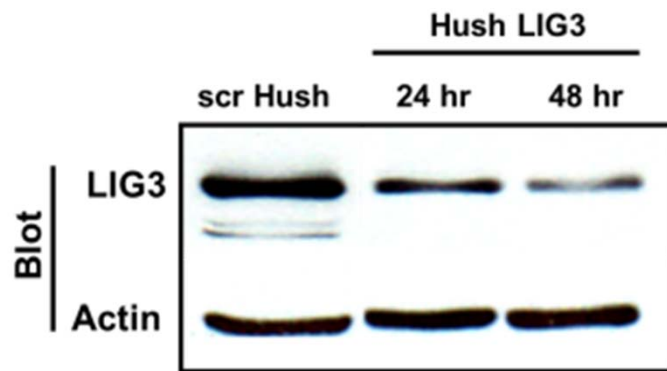



Figure S6

A)

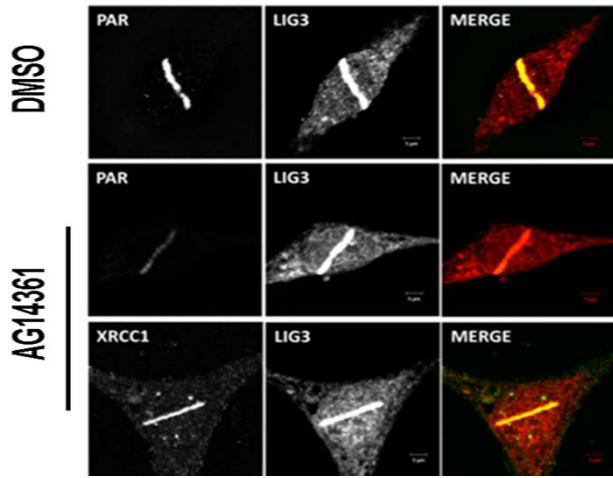

B)

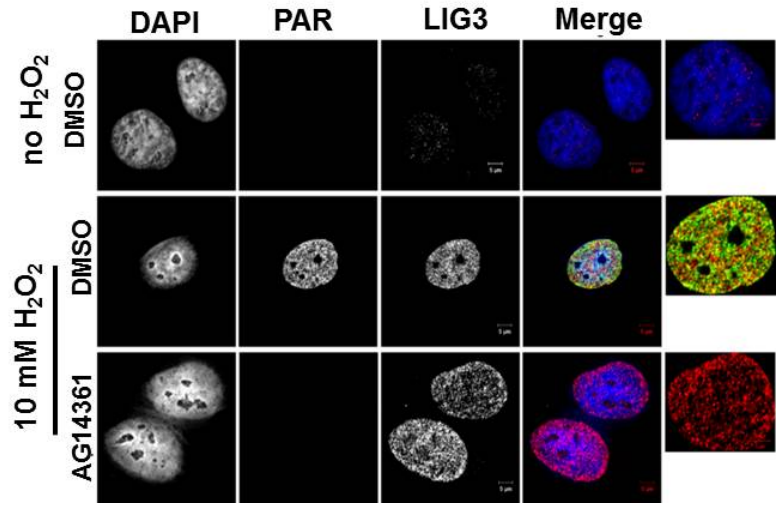

C)

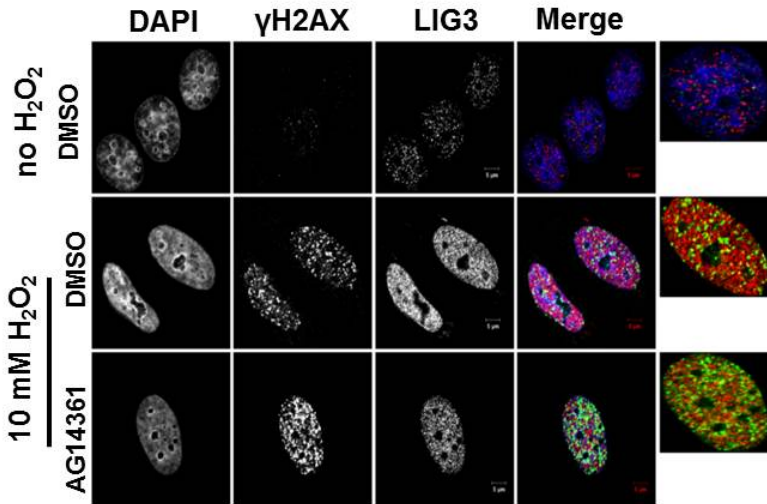

D)

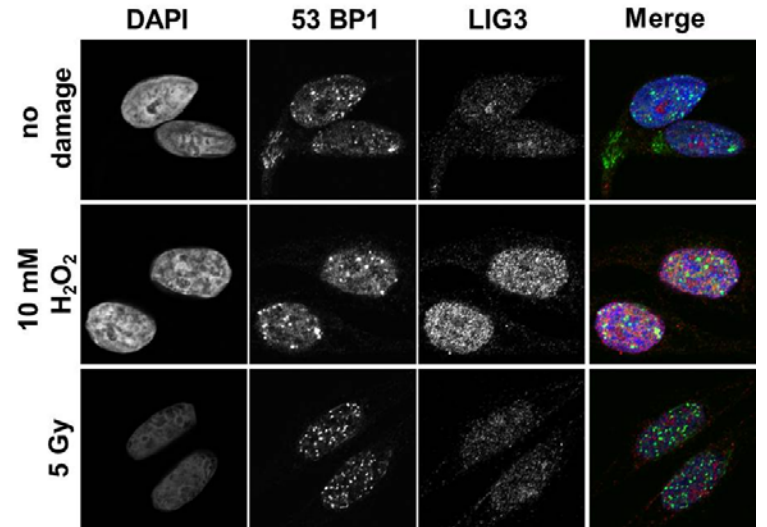

Figure S7

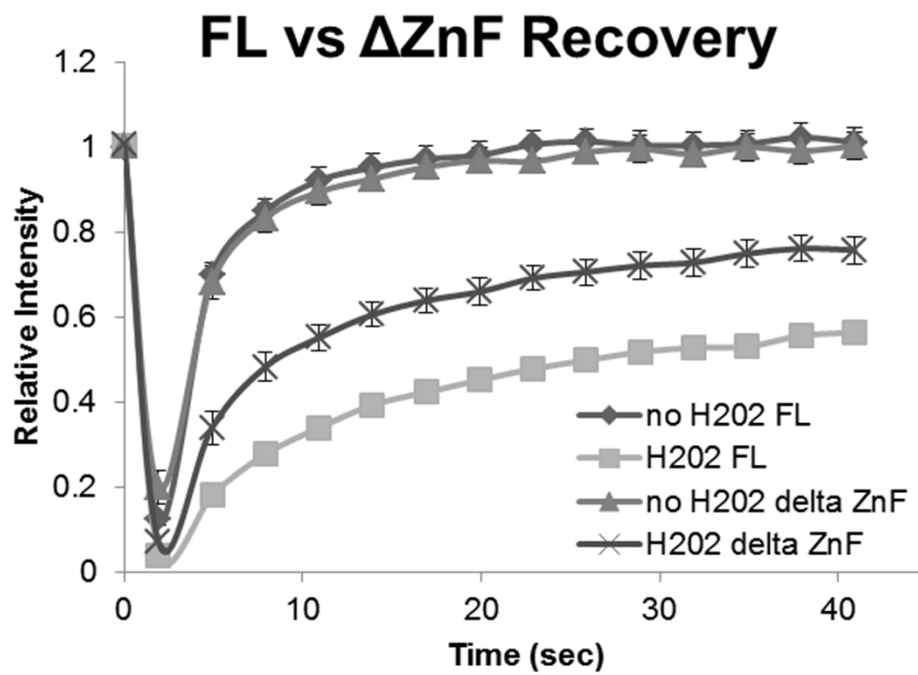

Figure S8

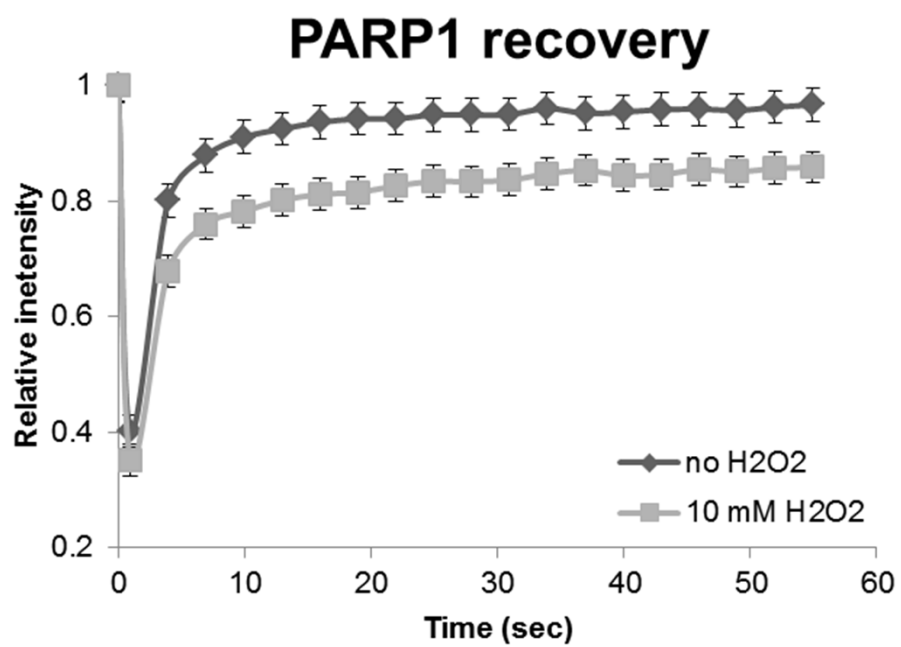

Supplement: supp_gku1307_nar-02583-d-2014-File003.pdf [file supp_gku1307_nar-02583-d-2014-File003.pdf]
